# Supplementary material
Source: publisher figshare collection journal article supplement (https://karger.figshare.com/ndownloader/files/27358178)
Supplement: Supplementary file 1 [file 27358178]

# Supplementary Material

**Fig. S1. Boxplots of albumin (panel A) and hematocrit (panel B) over time for the AKI group and no-AKI group.**

| 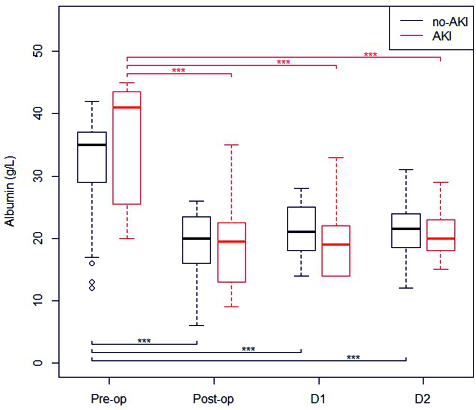  **A** | 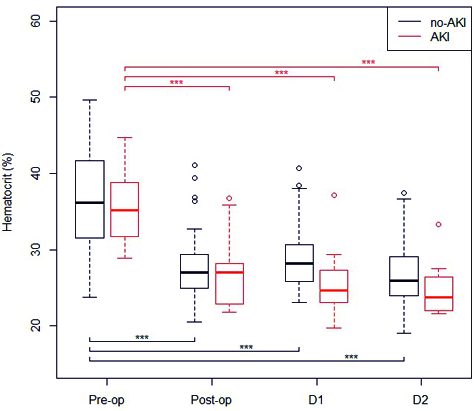  **B** |
| --- | --- |

Significant difference from pre-operative value: * = p-value <0.05; ** = p-value <0.01;

*** = p-value <0.001

*pre-op = pre-operative; post-op = post-operative; D1 = first post-operative day; D2 = second post-operative day; AKI = acute kidney injury; No-AKI = no acute kidney injury*
